# Supplementary material for: Integration of polypyridyl-based ionic liquids into MIL-101 for promoting CO2 conversion into cyclic carbonates under cocatalyst-free and solventless conditions
Source: Royal Society of Chemistry journal article supplement (doi:10.1039/d2nj03302j), 2022-01-01
Supplement: d2nj03302j1.pdf [file d2nj03302j1.pdf]

## Supplementary Information

### **Integration of polypyridyl-based ionic liquids into MIL-101 for promoting CO<sub>2</sub> conversion into cyclic carbonates under cocatalyst-free and solventless conditions**

Fangfang Li, Yan Chen, Aijia Gao, Wenjing Tong, Changchun Ji, Yong Cheng and Ying-Hua Zhou\*

The Key Laboratory of Functional Molecular Solids, Ministry of Education, Anhui Laboratory of Molecule-Based Materials, College of Chemistry and Materials Science, Anhui Normal University, Wuhu, Anhui 241002, China

E-mail: yhzhou@ahnu.edu.cn

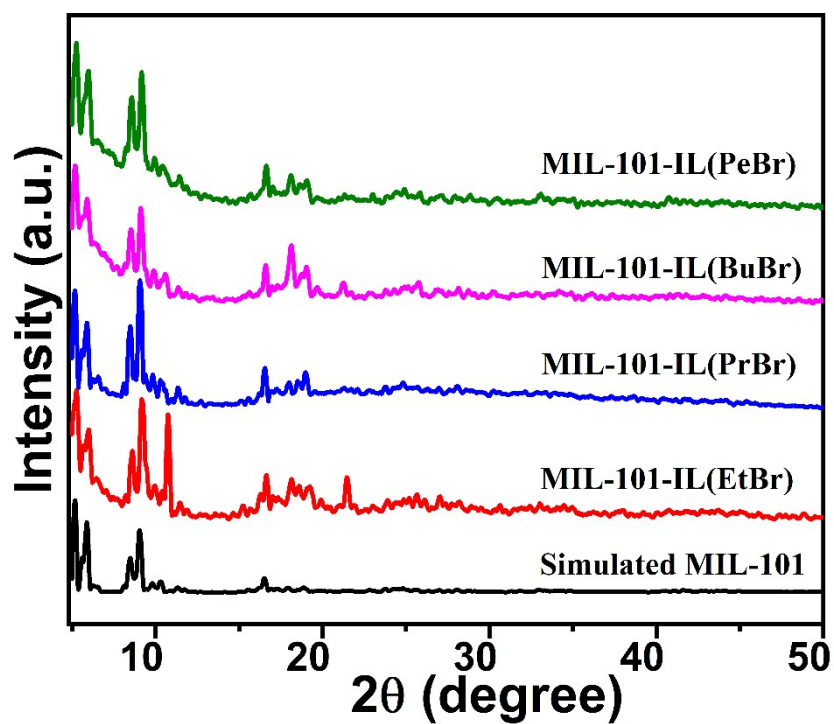

Fig. S1 PXRD patterns of MIL-101-IL(RBr).

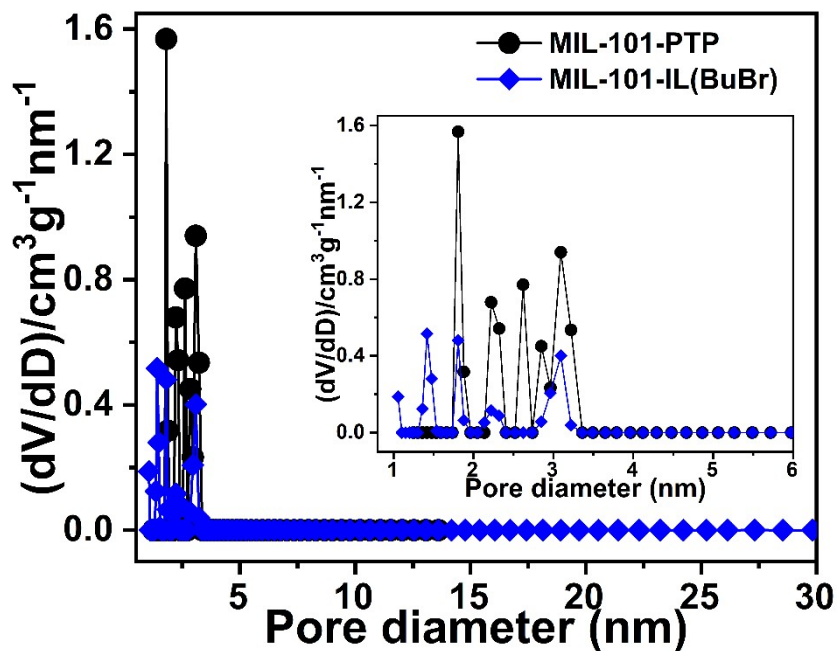

Fig. S2 NLDFT pore size distributions of MIL-101-PTP and MIL-101-IL(BuBr).

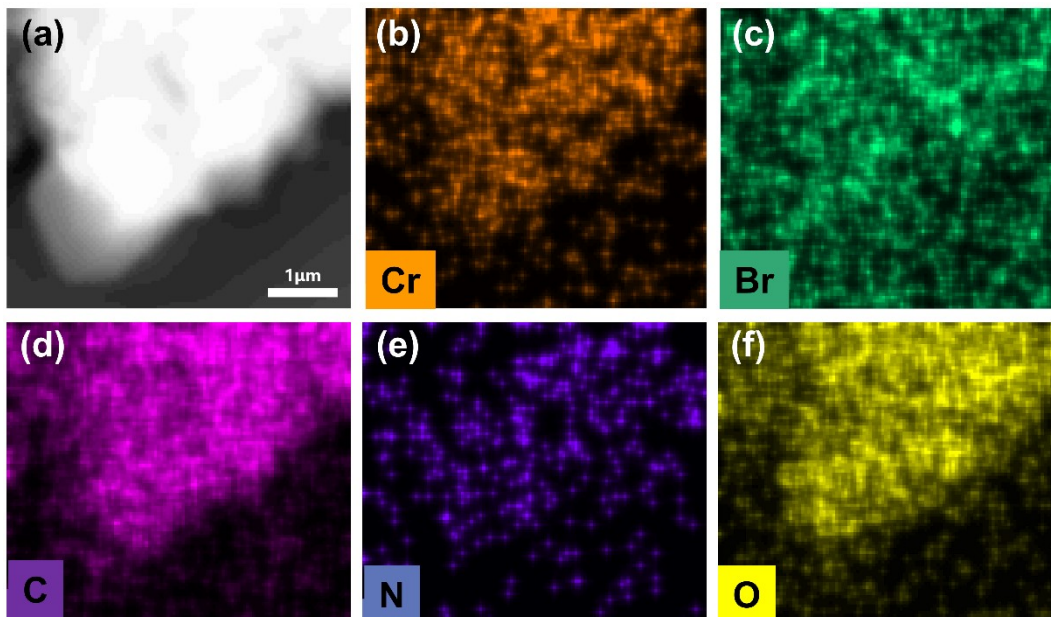

Fig. S3 SEM image and the elemental mapping of MIL-101-IL(BuBr).

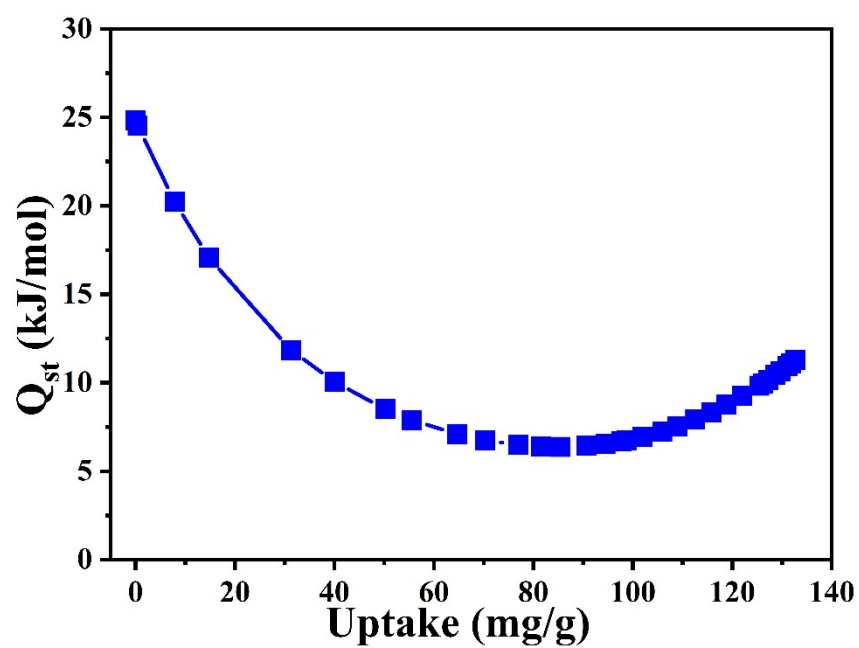

Fig. S4 Isosteric heat of CO<sub>2</sub> adsorption for of MIL-101-IL(BuBr) by Clausius–Clapeyron equation.

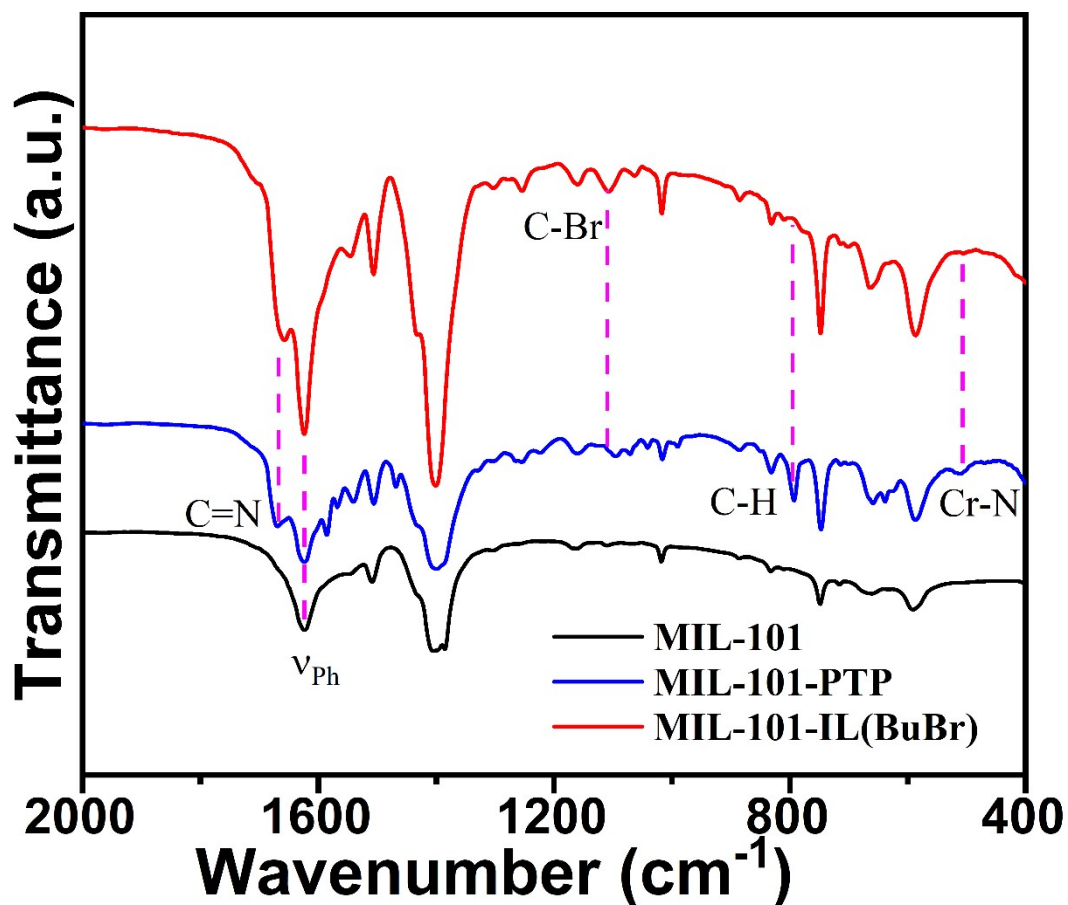

Fig. S5 FTIR spectra of MIL-101, MIL-101- PTP and MIL-101-IL(BuBr).

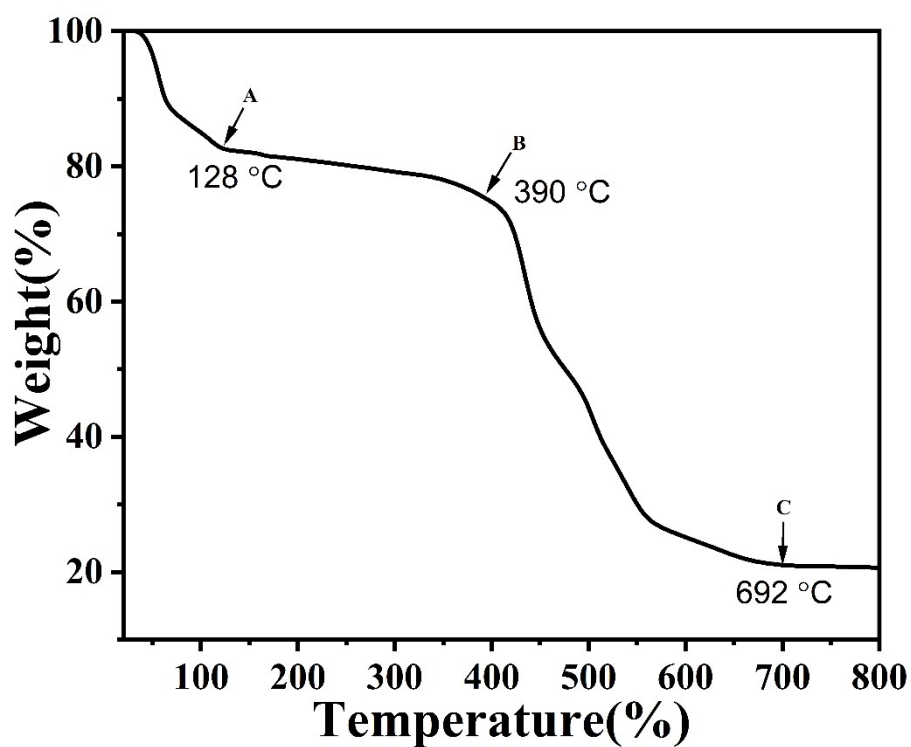

Fig. S6 TG curve of MIL-101-IL(BuBr).

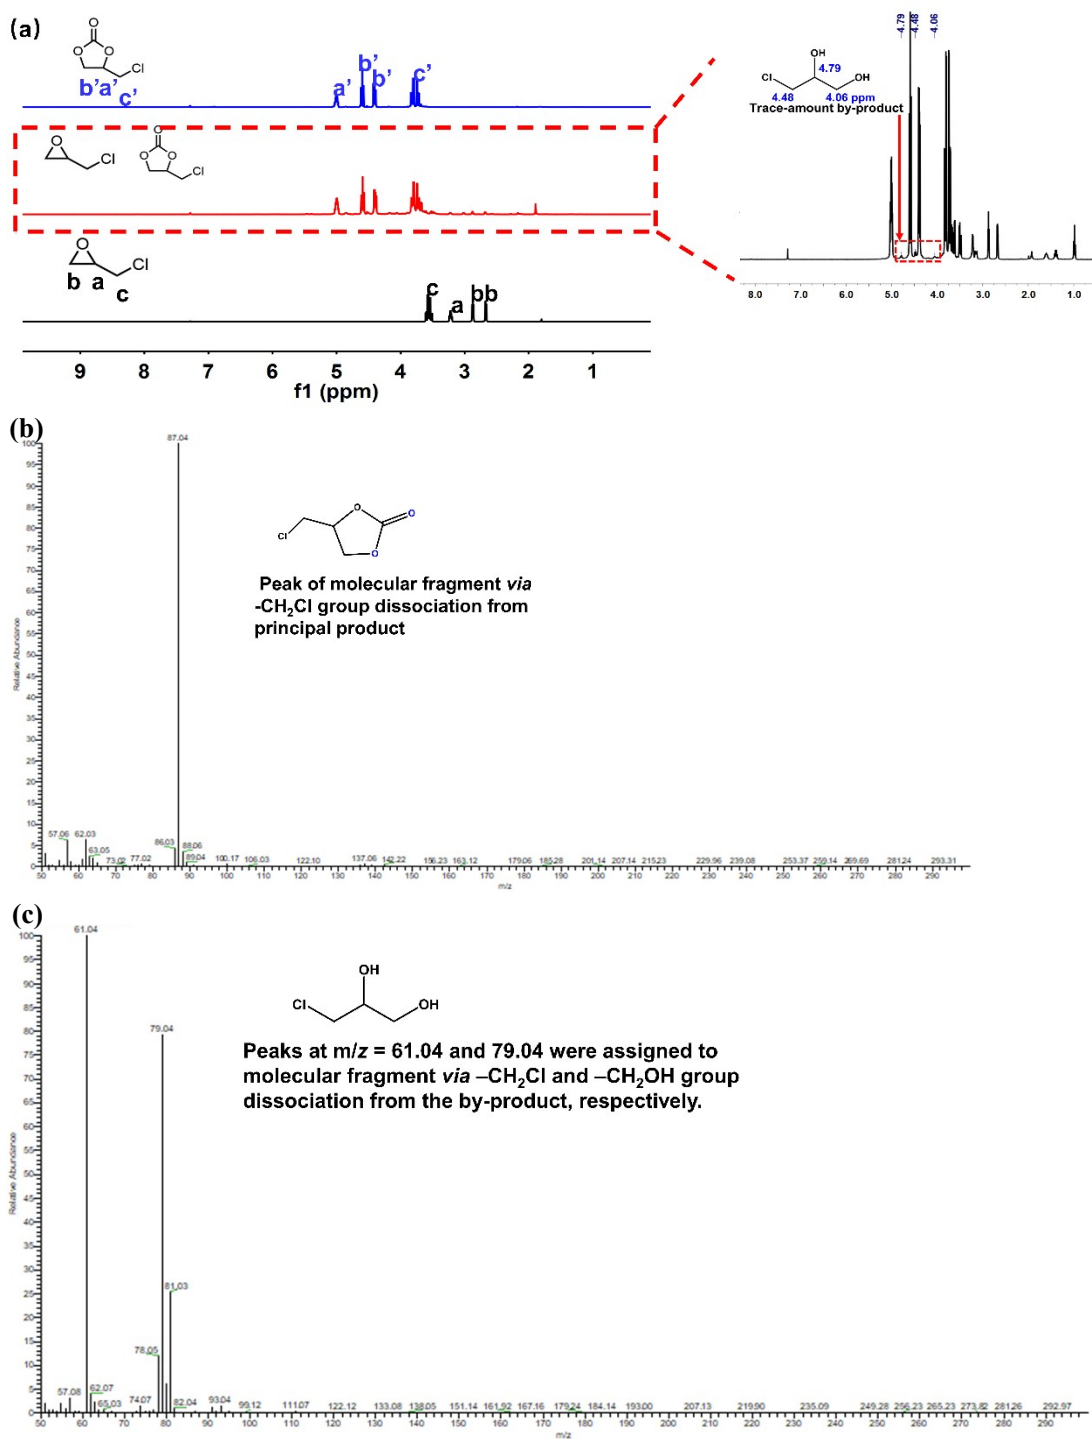

**Fig. S7** (a)  $^1\text{H-NMR}$  (a) spectra ( $\text{CDCl}_3$ ) for ECH cycloaddition with  $\text{CO}_2$  using MIL-101-IL(BuBr) catalyst. Black line: the substrate; Red line: the reaction solution after centrifugation (conditions: 100 mg catalyst, 1.0 MPa  $\text{CO}_2$  and 110  $^\circ\text{C}$  for 6 h); Blue line: the isolated product; (b) mass spectra of the principal product; (c) mass spectra of the by-product.

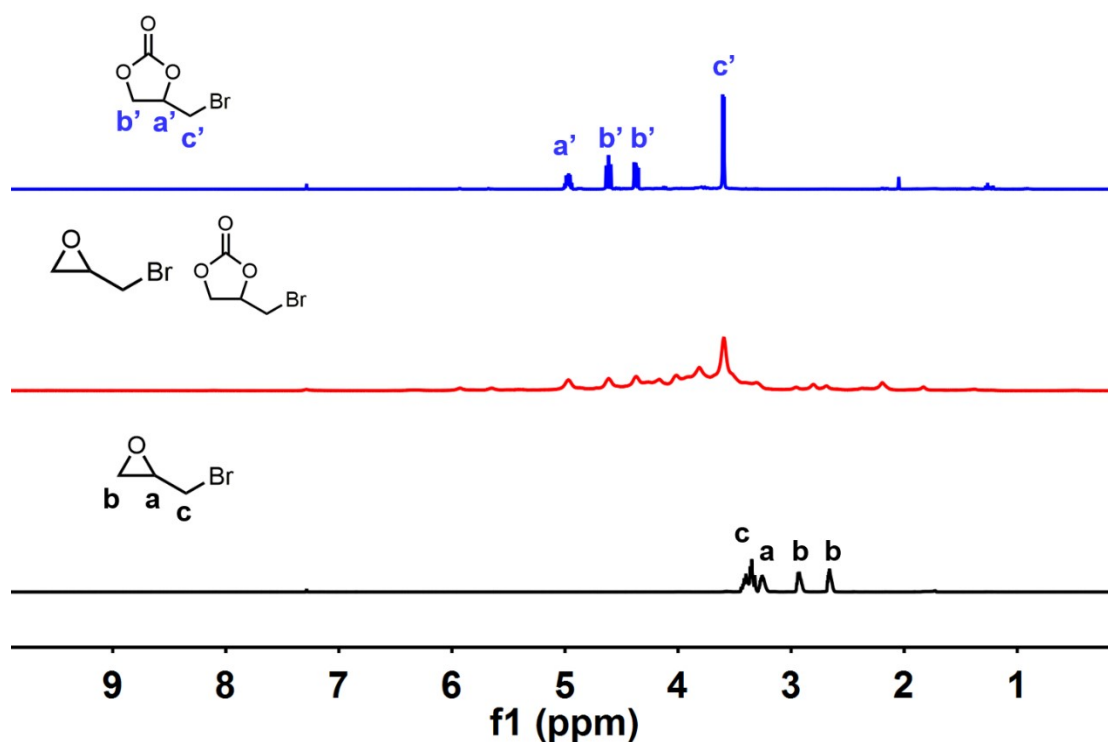

**Fig. S8**  $^1\text{H-NMR}$  spectra ( $\text{CDCl}_3$ ) for  $\text{CO}_2$  cycloaddition with epibromohydrin using MIL-101-IL(BuBr) catalyst. Black line: the substrate; Red line: the reaction solution after centrifugation (conditions: 100 mg catalyst, 1.0 MPa  $\text{CO}_2$  and 110  $^\circ\text{C}$  for 6 h); Blue line: the isolated product.

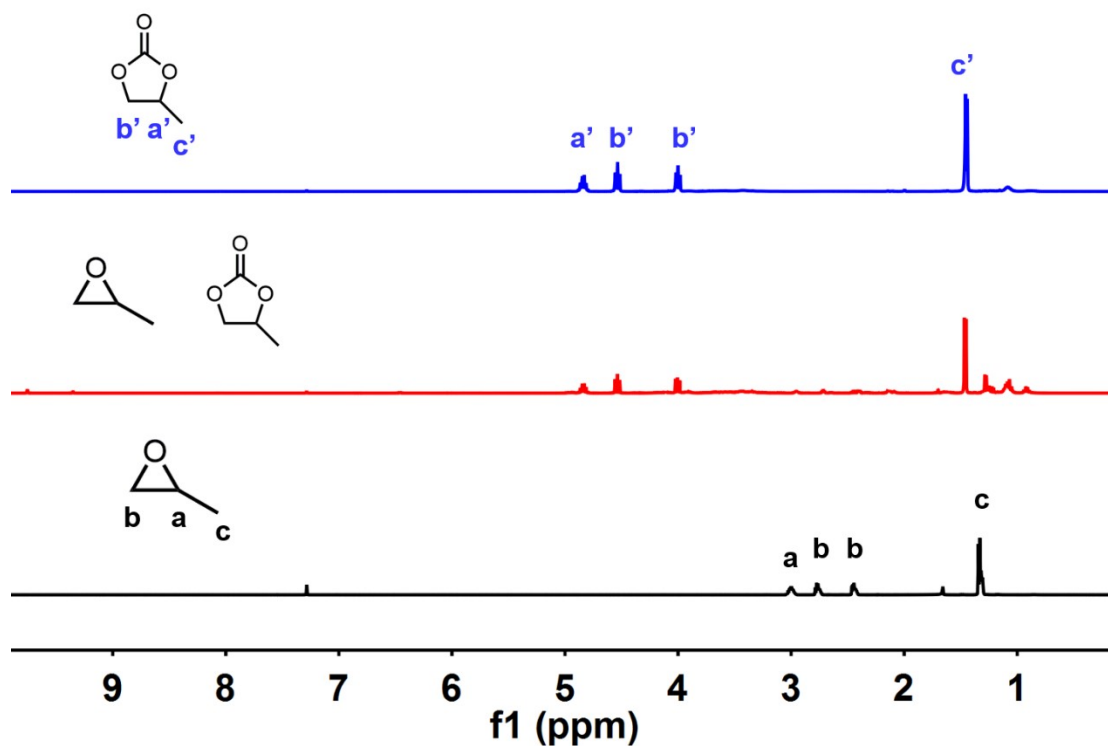

**Fig. S9**  $^1\text{H-NMR}$  spectra ( $\text{CDCl}_3$ ) for  $\text{CO}_2$  cycloaddition with propylene oxide using MIL-101-IL(BuBr) catalyst. Black line: the substrate; Red line: the reaction solution after centrifugation (conditions: 100 mg catalyst, 1.0 MPa  $\text{CO}_2$  and 110  $^\circ\text{C}$  for 6 h); Blue line: the isolated product.

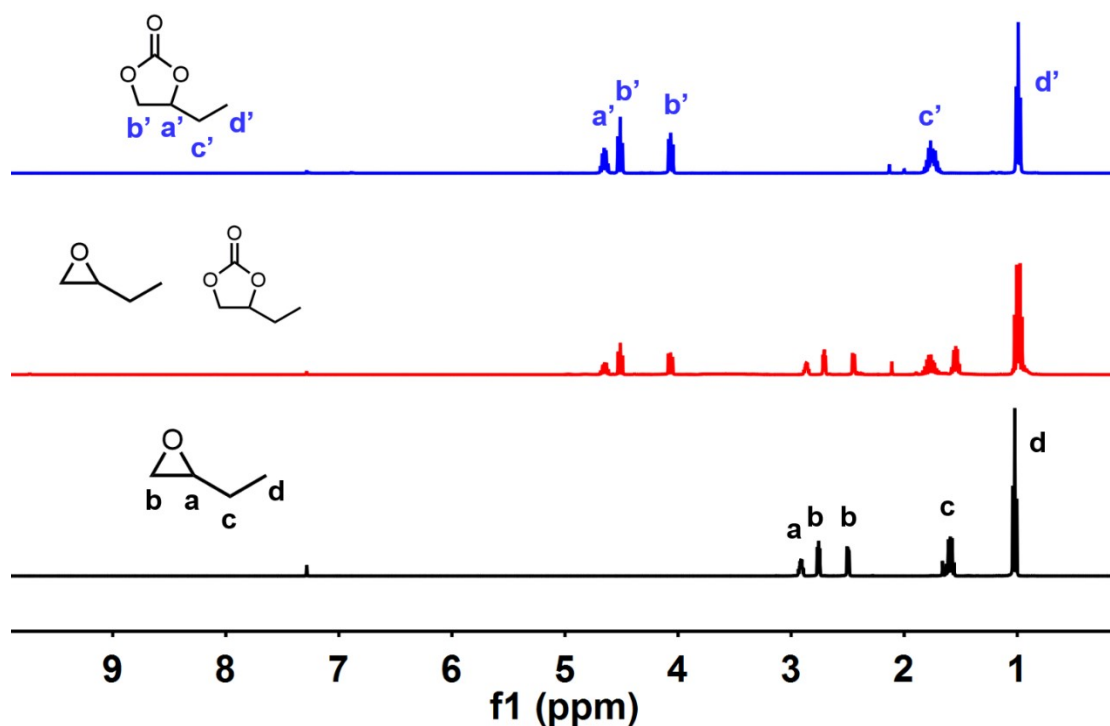

**Fig. S10** <sup>1</sup>H-NMR spectra (CDCl<sub>3</sub>) for CO<sub>2</sub> cycloaddition with 1,2-epoxybutane using MIL-101-IL(BuBr) catalyst. Black line: the substrate; Red line: the reaction solution after centrifugation (conditions: 100 mg catalyst, 1.0 MPa CO<sub>2</sub> and 110 °C for 6 h); Blue line: the isolated product.

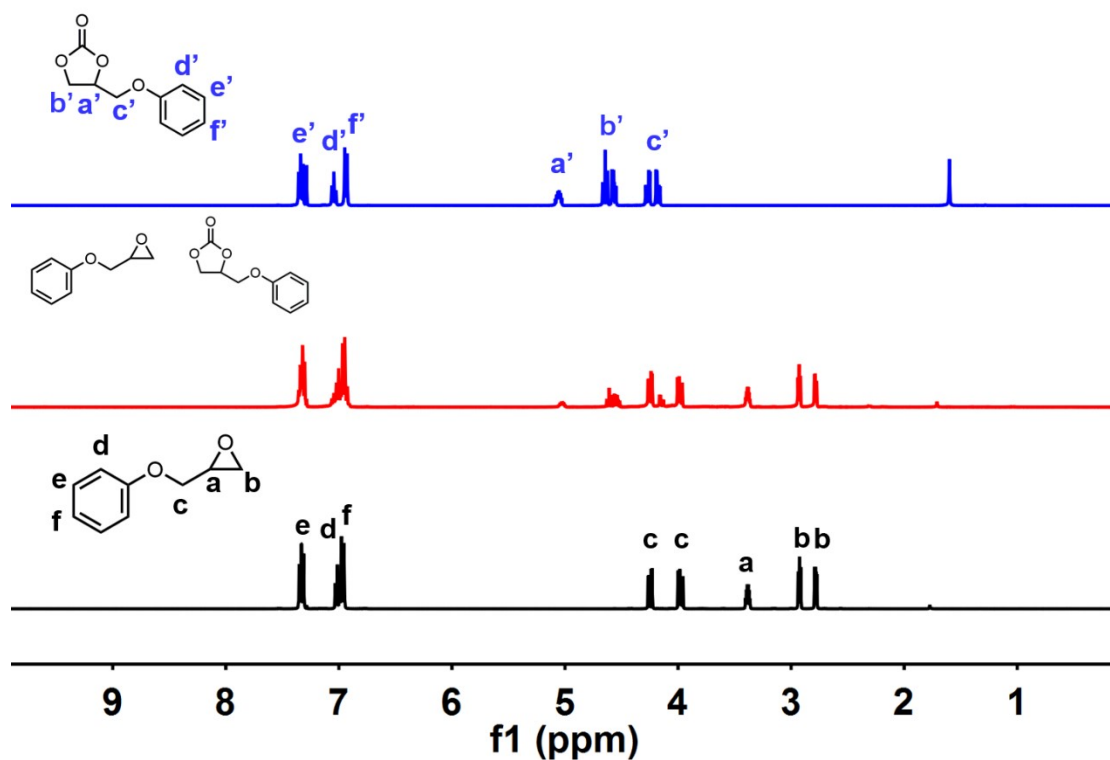

**Fig. S11** <sup>1</sup>H-NMR spectra (CDCl<sub>3</sub>) for CO<sub>2</sub> cycloaddition with epoxypropyl phenyl ether using MIL-101-IL(BuBr) catalyst. Black line: the substrate; Red line: the reaction solution after

centrifugation (conditions: 100 mg catalyst, 1.0 MPa CO<sub>2</sub> and 110 °C for 6 h); Blue line: the isolated product.

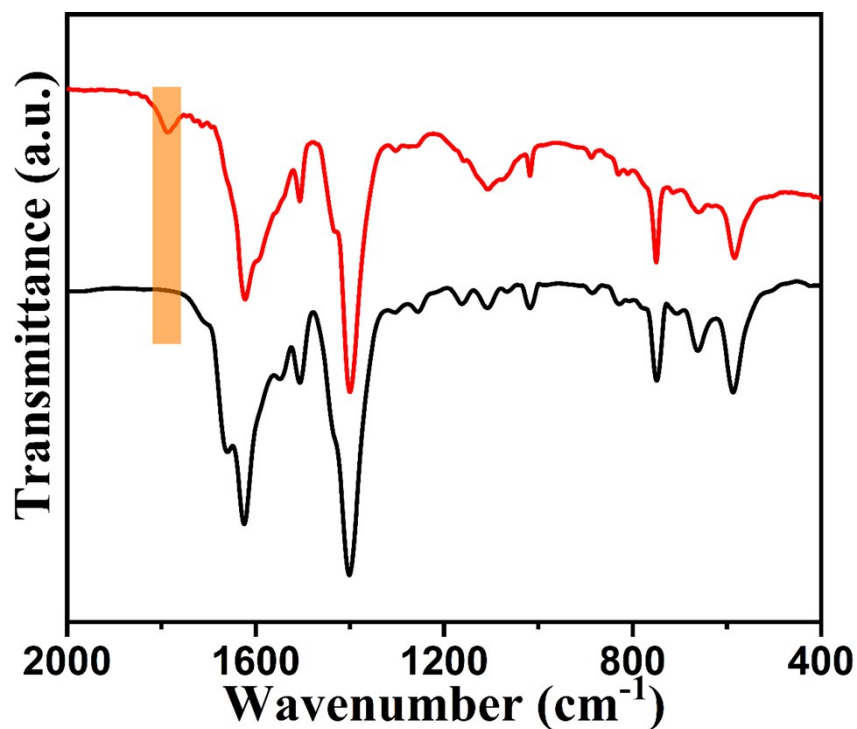

Fig. S12 FTIR spectra for the fresh (black line) and reused (red line) MIL-101-IL(BuBr).

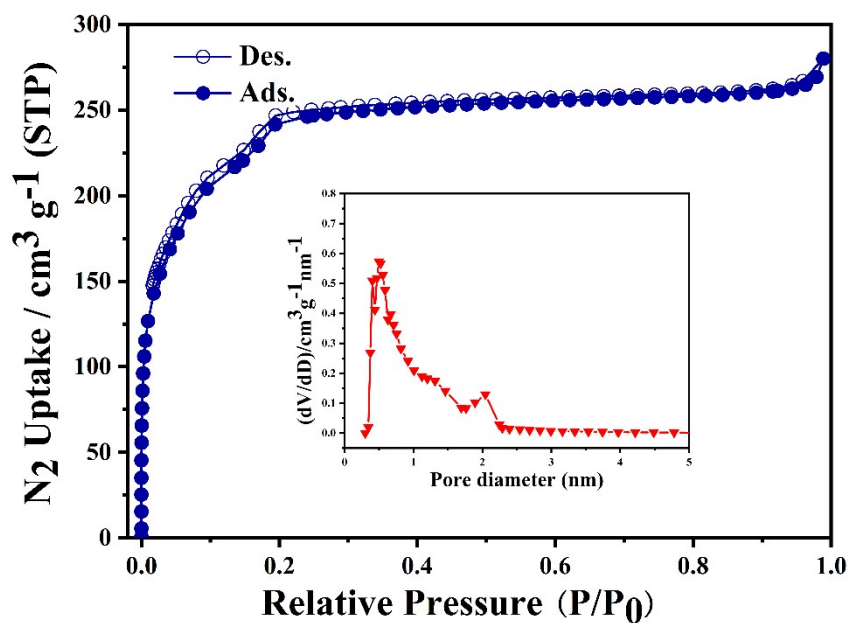

Fig. S13 N<sub>2</sub> adsorption and desorption isotherms at 77 K of the reused MIL-101-IL(BuBr). Inset: the NLDFT pore size distribution.



**Table S1.** Elemental analysis of the MIL-101 derivatives.

| Element                 | C wt% | N wt% | H wt% |
|-------------------------|-------|-------|-------|
| Theoretical MIL-101(Cr) | 24.64 | 0     | 5.69  |
| MIL-101-PTP             | 47.18 | 5.61  | 3.15  |
| MIL-101-IL(BuBr)        | 32.38 | 0.81  | 2.81  |
